# Supplementary material
Source: Springer Nature journal article supplement (https://www.springermedizin.de/resource/supplementary/12913_2011_2032_MOESM1_ESM.pdf/9529724)
Supplement: MOESM1 [file 9529724]

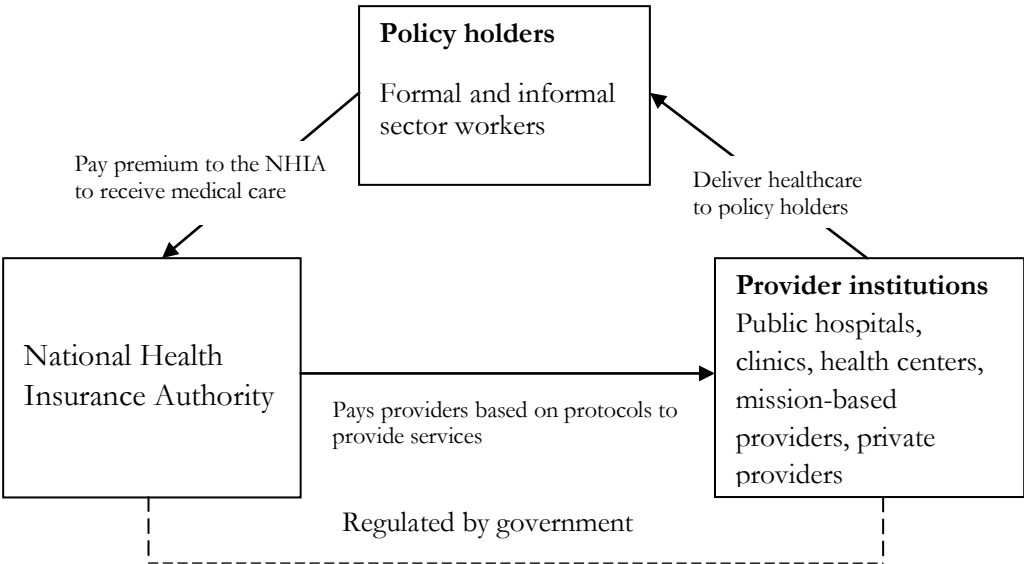

**Policy holders**

Formal and informal sector workers

Pay premium to the NHIA to receive medical care

Deliver healthcare to policy holders

National Health Insurance Authority

Pays providers based on protocols to provide services

**Provider institutions**

Public hospitals, clinics, health centers, mission-based providers, private providers

Regulated by government
